# Supplementary material
Source: Royal Society of Chemistry journal article supplement (doi:10.1039/d6gc01638c)
Supplement: d6gc01638c1.pdf [file d6gc01638c1.pdf]

## Supplemental Information

### **Development of Degradable Epoxy-Acid Thermosetting Polymers and Recyclable Composites by Dual-functional Liquid Hardeners Derived from Solid Carboxylic Acids**

**Authors:** *Nate D. Gangelhoff, and Chen Wang\**

Department of Materials Science and Engineering, University of Utah, Salt Lake City, Utah 84112,  
USA

\*Corresponding Author: [chen.wang@utah.edu](mailto:chen.wang@utah.edu)

## Supplemental Tables

| Sample         | Flexural Stress (Mpa) | Flexural Strain (%) | Flexural Modulus (Gpa) |
|----------------|-----------------------|---------------------|------------------------|
| SuA            | 86.55±31.53           | 2.45±0.69           | 3.97±0.49              |
| SeA            | 163.71±27.61          | 4.79±1.11           | 4.03±0.42              |
| AzA            | 117.26±48.06          | 3.37±1.64           | 3.79±0.56              |
| DdA            | 88.35±49.07           | 3.59±2.40           | 2.80±0.30              |
| tChA           | 44.94±4.50            | 1.13±0.14           | 3.17±0.58              |
| oPA            | 46.72±5.8             | 1.18±0.14           | 3.59±0.14              |
| iPA            | 34.93±13.88           | 0.99±0.30           | 3.23±0.56              |
| cChA           | 59.12±12.04           | 1.37±0.15           | 4.85±0.52              |
| Infusion Resin | 58.88±4.60            | 10.97±1.83          | 0.76±0.04              |

**Table S1.** Flexural properties of neat polymer samples.

**Table S2.** Summary of prior work (Ref. 22) contrasted with the developments in the present work.

|                                      | <b>Previous Work<br/>(J. Mater. Chem. A, 2025)</b>                                                                                           | <b>Present Work</b>                                                                                                                                                          |
|--------------------------------------|----------------------------------------------------------------------------------------------------------------------------------------------|------------------------------------------------------------------------------------------------------------------------------------------------------------------------------|
| <b>Core concept</b>                  | Established that DMAEMA forms a supramolecular ionic liquid complex with solid dicarboxylic acids creating low viscosity dual cure hardeners | Develops the established ionic-liquid hardener platform with a specific focus on enabling circular recovery of composite fibers through chemically recyclable network design |
| <b>Tertiary amine (meth)acrylate</b> | DMAEMA                                                                                                                                       | DMAEMA and DMAEA                                                                                                                                                             |
| <b>Epoxy monomer</b>                 | Glycerol and sorbitol based                                                                                                                  | BADGE and TMPTGE                                                                                                                                                             |
| <b>Mechanical testing</b>            | Tensile data on two acid systems                                                                                                             | Flexural strength, viscosity, and DMA on 8 acids (aromatic, cyclic, linear)                                                                                                  |
| <b>Recyclability</b>                 | Not explored                                                                                                                                 | Enabled through ethylene glycol transesterification at 170 °C                                                                                                                |
| <b>Composite application</b>         | Listed as future work                                                                                                                        | Glass fiber composites manufactured via VARTM enabling closed loop fiber recovery with 2 <sup>nd</sup> life UTS within 4% of virgin                                          |
| <b>Nucleophilic catalyst</b>         | Not explored                                                                                                                                 | Both EMI-2,4 and TPP explored to tame etherification in the form of epoxy photopolymerization and improve degradability                                                      |

**Table S3.** Formulations of the polymers synthesized in this study, given in mass and based on 0.01 mol of acid and (meth)acrylate functional groups.

| Sample name    | DMAEMA (g) | DMAEA (g) | Acid (g)    | BADGE (g) | TMPTG E (g) | Catalyst (g)   | BHT (g) | TPOL (g) |
|----------------|------------|-----------|-------------|-----------|-------------|----------------|---------|----------|
| iPA            | 0.942      | 0.573     | 0.830, iPA  | 0.851     | 0.504       | 0              | 0.025   | 0.037    |
| oPA            | 0.942      | 0.573     | 0.830, oPA  | 0.851     | 0.504       | 0              | 0.025   | 0.037    |
| DdA            | 0.942      | 0.573     | 1.152, DdA  | 0.851     | 0.504       | 0              | 0.025   | 0.037    |
| SeA            | 0.942      | 0.573     | 1.010, SeA  | 0.851     | 0.504       | 0              | 0.025   | 0.037    |
| AzA            | 0.942      | 0.573     | 0.941, AzA  | 0.851     | 0.504       | 0              | 0.025   | 0.037    |
| SuA            | 0.942      | 0.573     | 0.871, SuA  | 0.851     | 0.504       | 0              | 0.025   | 0.037    |
| cChA           | 0.942      | 0.573     | 0.860, cChA | 0.851     | 0.504       | 0              | 0.025   | 0.037    |
| tChA           | 0.942      | 0.573     | 0.860, tChA | 0.851     | 0.504       | 0              | 0.025   | 0.037    |
| 1% EMI-2,4     | 1.570      | 0         | 1.010, SeA  | 0.851     | 0.504       | EMI-2,4, 0.039 | 0.025   | 0.037    |
| 5% EMI-2,4     | 1.570      | 0         | 1.010, SeA  | 0.851     | 0.504       | EMI-2,4, 0.197 | 0.025   | 0.037    |
| 1% TPP         | 1.570      | 0         | 1.010, SeA  | 0.851     | 0.504       | TPP, 0.039     | 0.025   | 0.037    |
| 5% TPP         | 1.570      | 0         | 1.010, SeA  | 0.851     | 0.504       | TPP, 0.197     | 0.025   | 0.037    |
| Control        | 1.570      | 0         | 1.010, SeA  | 0.851     | 0.504       | 0              | 0.025   | 0.037    |
| 0% Acrylate    | 1.570      | 0.000     | 0.860, cChA | 0.851     | 0.504       | 0              | 0.025   | 0.037    |
| 10% Acrylate   | 1.413      | 0.143     | 0.860, cChA | 0.851     | 0.504       | 0              | 0.025   | 0.037    |
| 20% Acrylate   | 1.256      | 0.246     | 0.860, cChA | 0.851     | 0.504       | 0              | 0.025   | 0.037    |
| 30% Acrylate   | 1.099      | 0.430     | 0.860, cChA | 0.851     | 0.504       | 0              | 0.025   | 0.037    |
| 40% Acrylate   | 0.942      | 0.573     | 0.860, cChA | 0.851     | 0.504       | 0              | 0.025   | 0.037    |
| Infusion Resin | 0.942      | 0.573     | 1.010, SeA  | 0.851     | 0.504       | EMI-2,4, 0.197 | 0.025   | 0.037    |

### Supplemental Figures

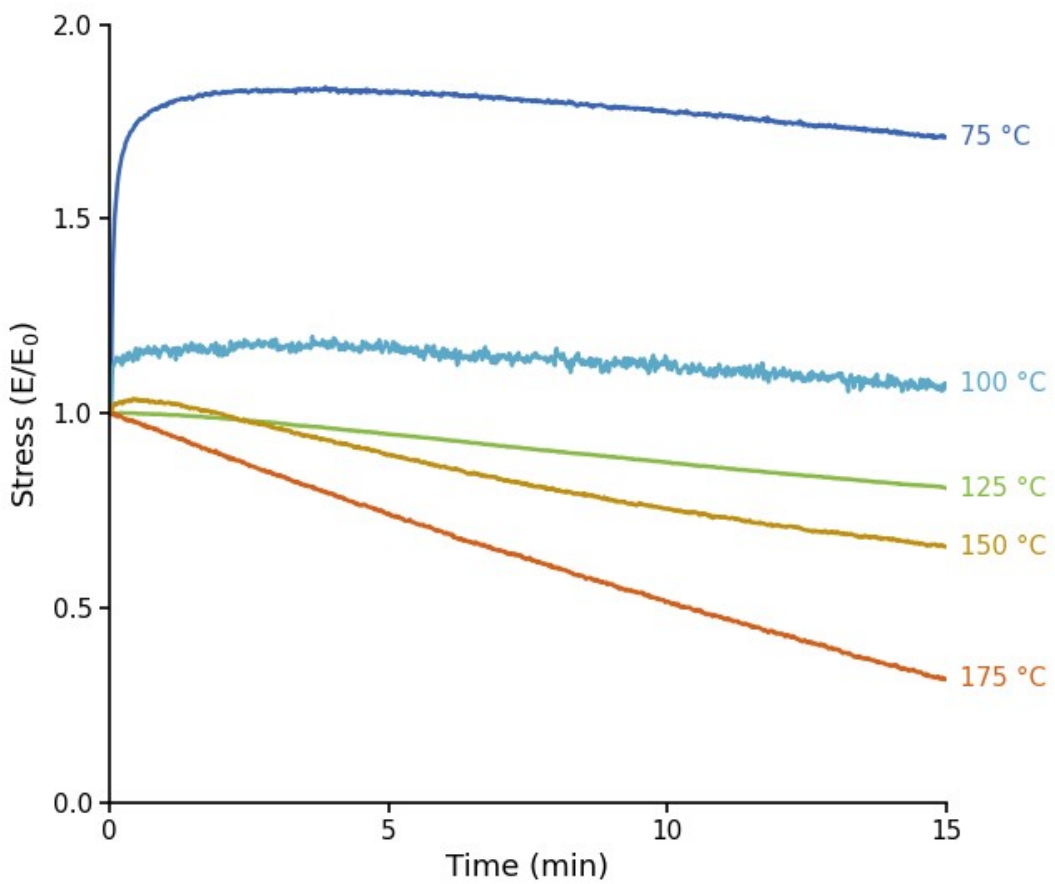

**Figure S1.** Stress relaxation behavior of 5wt.% EMI-2,4 polymer sample with 1% tensile strain on a rectangular specimen.

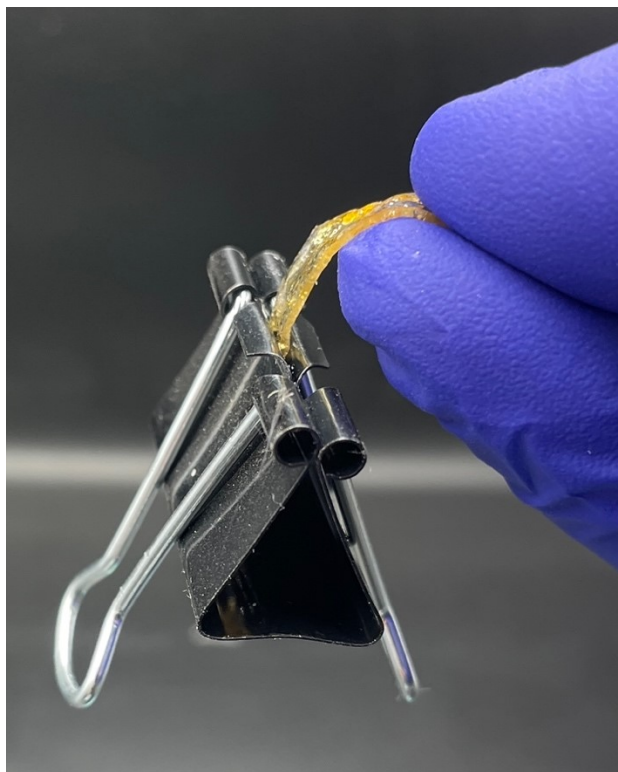

**Figure S2.** Photo of the sample produced with non-reactive tertiary amine catalyst, Dimethylethanolamine (DMAE) at 23 °C.

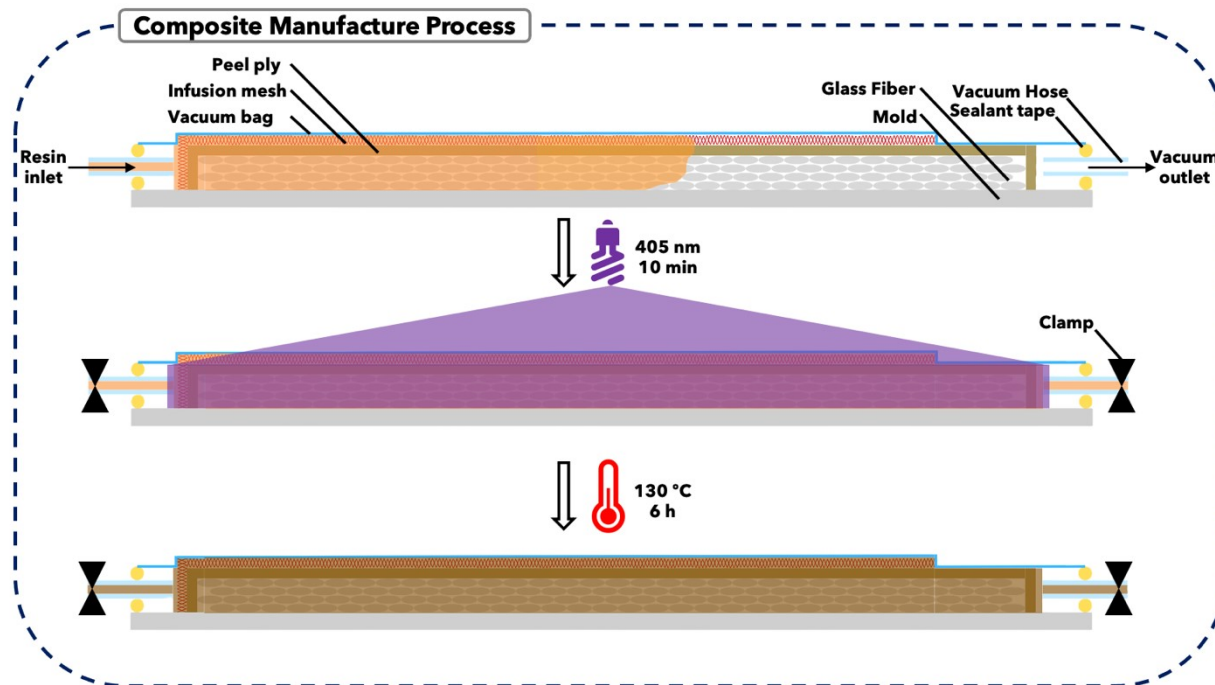

**Figure S3.** Scheme showing the photo-heat composite manufacturing process.

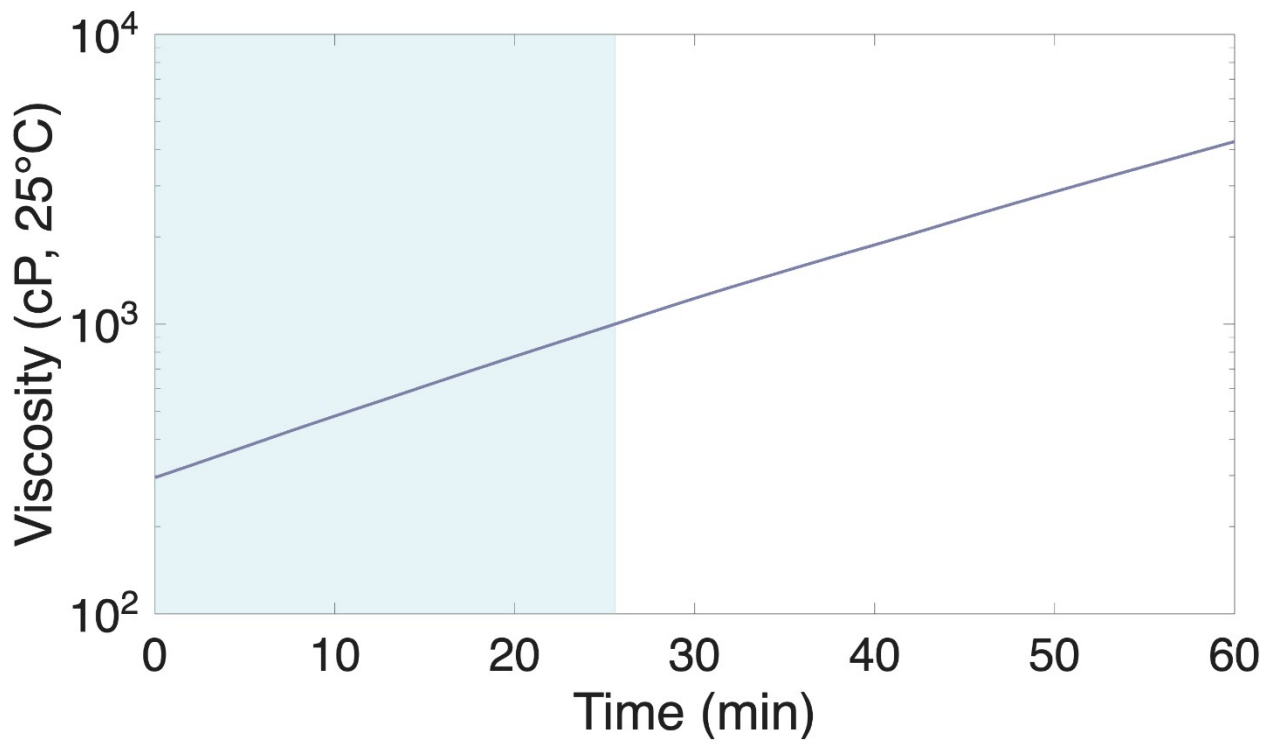

**Figure S4.** Viscosity of 5wt.% EMI-2,4 resin over time with infusible time highlighted in blue, denoting time till viscosity exceeds 1000 cP.

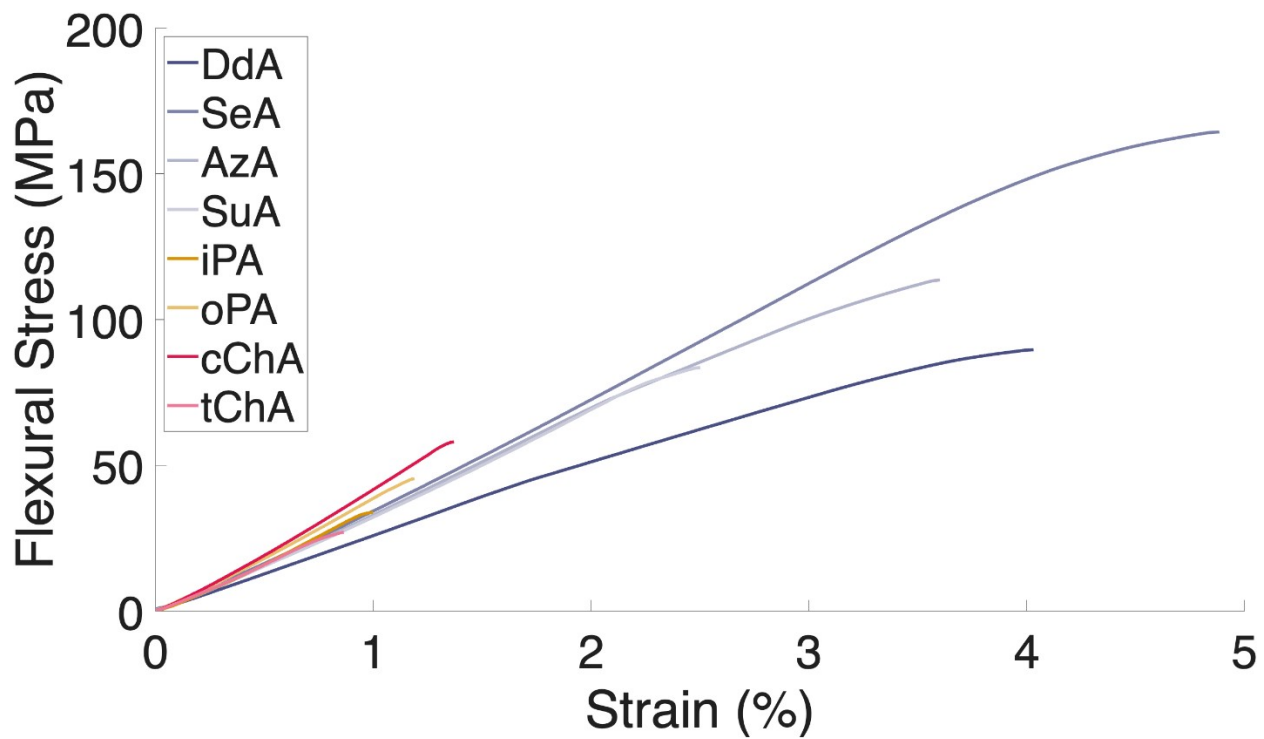

**Figure S5.** Flexural strength of neat polymer samples.

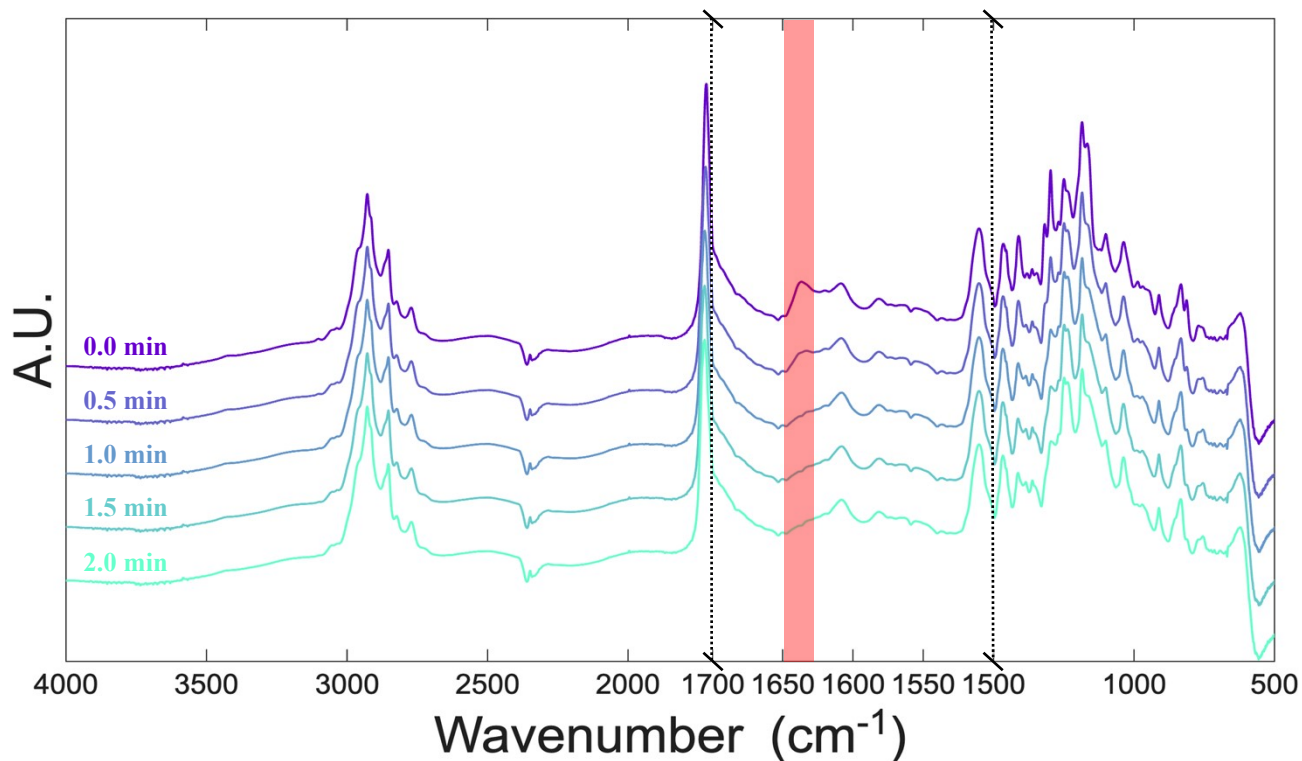

**Figure S6.** UV time series FTIR of SeA neat resin system at 5mW/cm<sup>2</sup> showing conversion of (meth)acrylate peak.

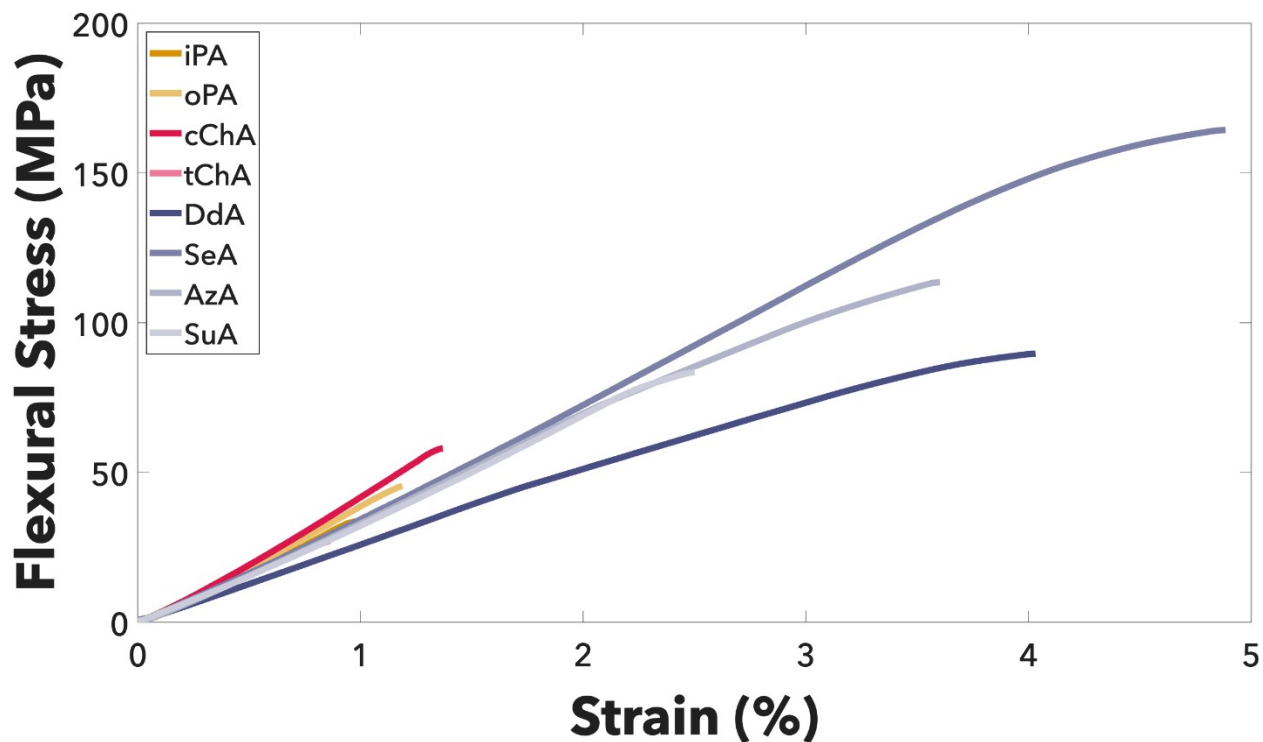

**Figure S7.** Flexural strength of neat polymer samples.

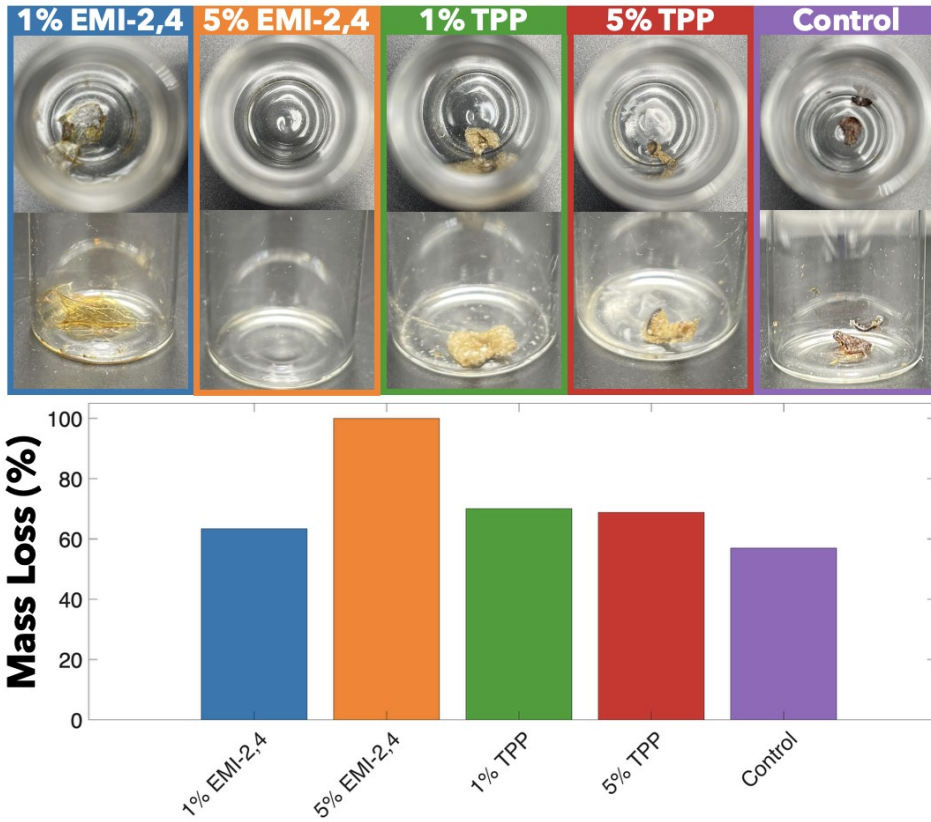

Figure S8. Degradation of methacrylate SeA polymer with varying catalyst loading.

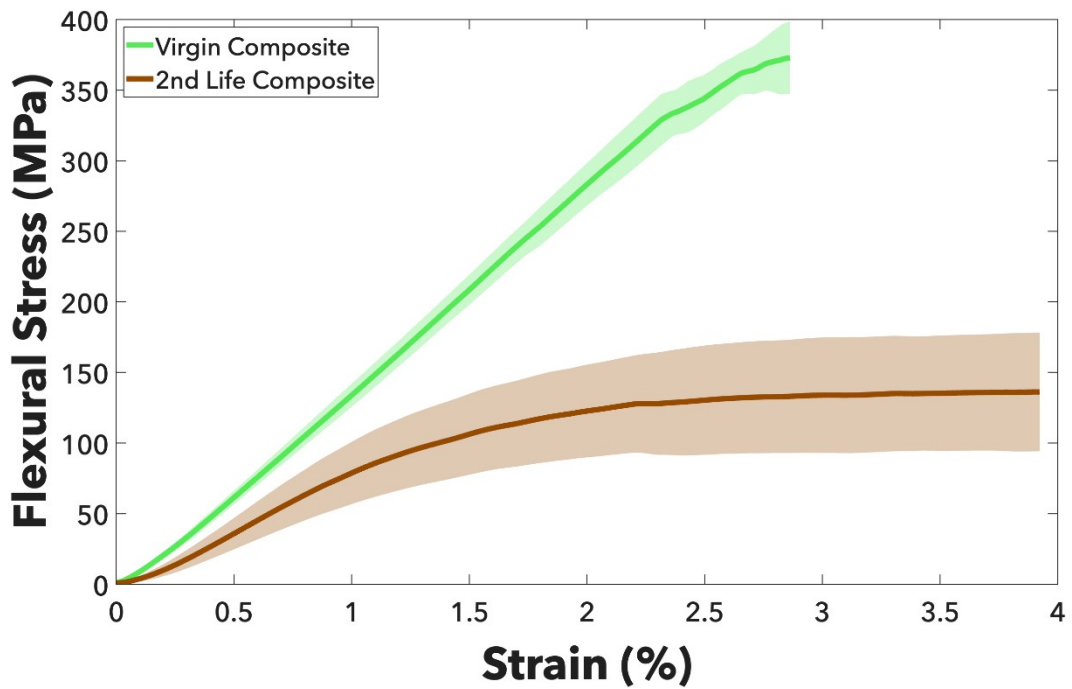

Figure S9. Stress-strain curve of virgin vs second life composite parts using SeA resin without the inclusion of 5wt% EMI-2,4
